# Supplementary material for: Culprit and Nonculprit Recurrent Ischemic Events in Patients With Myocardial Infarction: Data From SWEDEHEART (Swedish Web System for Enhancement and Development of Evidence‐Based Care in Heart Disease Evaluated According to Recommended Therapies)
Source: PubMed Central journal article supplement — J Am Heart Assoc. 2018 Jan 4;7(1):e007174. doi: 10.1161/JAHA.117.007174 (PMC5778965; doi:10.1161/jaha.117.007174), 2018-01-04

# **Supplemental Material**

**Table S1. Baseline characteristics at the index infarction of patients with first-occurrence myocardial infarction with culprit lesion identified and indeterminate recurrent myocardial infarction during follow-up.**

| <b>Variable (n, %)</b>                                                                                    | <b>First-occurrence myocardial infarction with culprit artery identified (n = 44 332)</b> | <b>Recurrent myocardial infarction, indeterminate (n = 1566)</b> |
|-----------------------------------------------------------------------------------------------------------|-------------------------------------------------------------------------------------------|------------------------------------------------------------------|
| Men                                                                                                       | 31 155 (70.3)                                                                             | 930 (59.4)                                                       |
| Age (years)                                                                                               | 66 ± 11.70                                                                                | 71.3 ± 11.8                                                      |
| Body weight (kg)                                                                                          | 81.3 ± 15.7                                                                               | 78.5 ± 15.9                                                      |
| <b>Indication for the coronary angiography during hospitalization for the index myocardial infarction</b> |                                                                                           |                                                                  |
| ST-elevation MI                                                                                           | 23 446 (53)                                                                               | 735 (47.3)                                                       |
| Non-ST-elevation MI                                                                                       | 20 752 (47)                                                                               | 820 (52.7)                                                       |
| <b>Coexisting conditions</b>                                                                              |                                                                                           |                                                                  |
| Hypertension                                                                                              | 18 494 (42.1)                                                                             | 825 (53.2)                                                       |
| Diabetes mellitus                                                                                         | 6314 (14.3)                                                                               | 385 (24.6)                                                       |
| Statin use at admission                                                                                   | 7216 (16.4)                                                                               | 380 (24.5)                                                       |
| Smoker status: current                                                                                    | 12 706 (29.2)                                                                             | 363 (23.6)                                                       |
| Smoker status: former >1 month                                                                            | 18 899 (32.3)                                                                             | 510 (33.1)                                                       |
| Previous MI                                                                                               | 0 (0)                                                                                     | 0 (0)                                                            |
| Previous PCI                                                                                              | 1678 (2.6)                                                                                | 101 (6.5)                                                        |
| Previous stroke                                                                                           | 5891 (9.5)                                                                                | 145 (9.7)                                                        |
| <b>Angiographic findings during hospitalization for the index myocardial infarction</b>                   |                                                                                           |                                                                  |
| One-vessel disease (not LM)                                                                               | 26 912 (60.8)                                                                             | 705 (45.1)                                                       |
| Two-vessel disease (not LM)                                                                               | 10 592 (23.9)                                                                             | 407 (26.1)                                                       |

|                                                                              |               |             |
|------------------------------------------------------------------------------|---------------|-------------|
| Three-vessel disease (not LM)                                                | 5145 (11.6)   | 318 (20.4)  |
| Left main stem                                                               | 1227 (2.8)    | 119 (7.6)   |
| <b>PCI at the during hospitalization for the index myocardial infarction</b> |               |             |
| No. of stents per procedure                                                  | 1.1 ± 0.6     | 1.1 ± 0.6   |
| Drug-eluting stent                                                           | 17 947 (43.9) | 411 (30.4)  |
| Bare-metal stent                                                             | 23 115 (56.7) | 951 (70.7)  |
| Stent diameter, mean (mm)                                                    | 3.1 ± 0.5     | 3.0 ± 0.5   |
| Total stent length, mean (mm)                                                | 21.5 ± 10.8   | 21.1 ± 10.3 |
| Treated vessel: RCA                                                          | 14 696 (33.1) | 477 (30.5)  |
| Treated vessel: Left main                                                    | 493 (1.1)     | 27 (1.7)    |
| Treated vessel: LAD                                                          | 19 856 (44.8) | 700 (44.7)  |
| Treated vessel: LCX                                                          | 9996 (22.5)   | 359 (22.9)  |
| ASA                                                                          | 7996 (18.2)   | 501 (32.3)  |
| Clopidogrel                                                                  | 863 (2.0)     | 64 (4.1)    |
| Ticagrelor                                                                   | 63 (0.1)      | 2 (0.1)     |
| Prasugrel                                                                    | 4 (0.4)       | 0 (0)       |
| <b>Medications during PCI for the index myocardial infarction</b>            |               |             |
| GP IIb/IIIa                                                                  | 10 328 (23.3) | 360 (23.0)  |
| Heparin                                                                      | 30 461 (68.7) | 1045 (66.7) |
| LMWH                                                                         | 1765 (4.0)    | 76 (4.9)    |
| Bivalirudin                                                                  | 15 935 (36.0) | 460 (29.4)  |
| <b>Medications at discharge for the index myocardial infarction</b>          |               |             |
| ASA                                                                          | 42 264 (95.8) | 501 (32.3)  |

---

|                      |               |             |
|----------------------|---------------|-------------|
| Clopidogrel          | 30 803 (69.6) | 64 (4.1)    |
| Ticagrelor           | 10 412 (23.5) | 2 (0.1)     |
| Prasugrel            | 1076 (2.4)    | 0 (0)       |
| Beta blockers        | 40 046 (90.5) | 1409 (90.1) |
| ACE/AT II inhibitors | 34 901 (78.9) | 1242 (79.4) |
| Calcium antagonists  | 4910 (11.1)   | 273 (17.5)  |
| Warfarin             | 2176 (4.9)    | 93 (6.0)    |
| Statins              | 41787 (94.5)  | 1448 (92.6) |

---

ASA, acetylsalicylic acid; CABG, coronary artery bypass grafting; GP, glycoprotein; LAD, left anterior descending artery; LCX, left circumflex artery; LM, left main stem; LMWH, low-molecular-weight heparin; MI, myocardial infarction; PCI, percutaneous coronary intervention; RCA, right coronary artery.

**Table S2. Angiographic findings in the subgroup of patients with identified culprit lesion at the index infarction and indeterminate recurrent myocardial infarction undergoing coronary catheterization.**

| <b>Variable (n, %)</b>                    | <b>Recurrent myocardial infarction, indeterminate (n = 661)</b> |
|-------------------------------------------|-----------------------------------------------------------------|
| Angiographic findings at the recurrent MI |                                                                 |
| No stenosed vessels                       | 288 (43.7)                                                      |
| One-vessel disease (not LM)               | 145 (22.0)                                                      |
| Two-vessel disease (not LM)               | 100 (15.2)                                                      |
| Three-vessel disease (not LM)             | 68 (10.3)                                                       |
| Main stem                                 | 58 (8.8)                                                        |
| Lesion severity:                          |                                                                 |
| A                                         | 28 (31.5)                                                       |
| B1                                        | 37 (41.6)                                                       |
| B2                                        | 11 (12.4)                                                       |
| C                                         | 8 (9.0)                                                         |
| Definitive stent thrombosis               | 0 (0)                                                           |

LM, left main stem.

**Figure S1.** Cumulative event probability estimated by the Kaplan–Meier method and numbers of patients at risk of recurrent myocardial infarction in patients with (yes) and without (no) the culprit lesion identified for the index myocardial infarction.

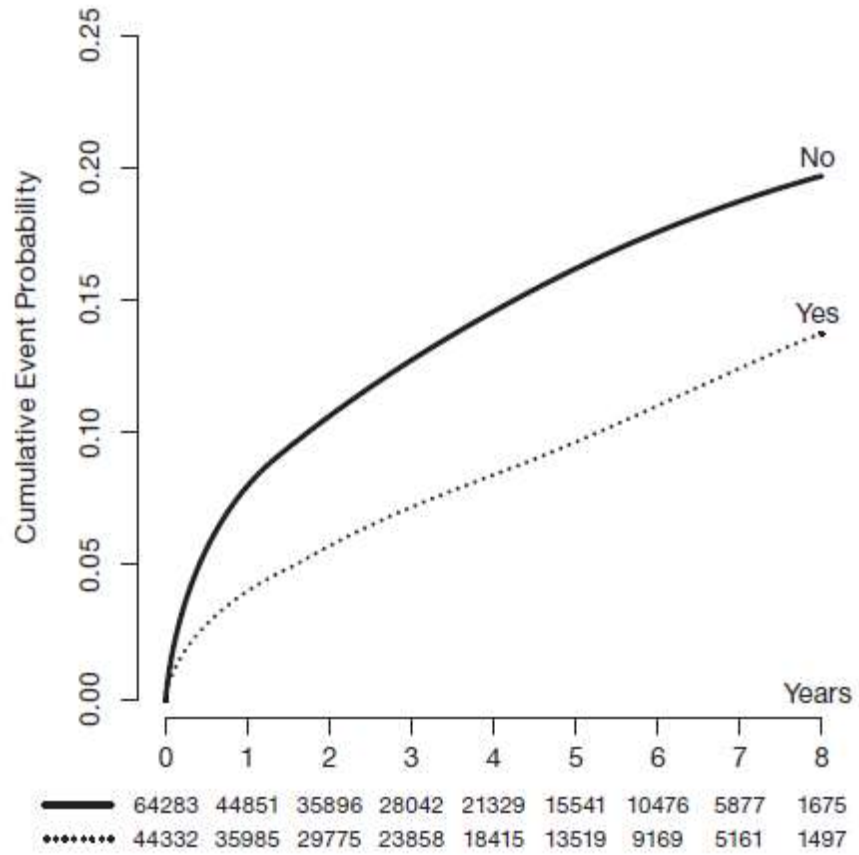

Supplement: JAH3-7-e007174-s001.pdf [file JAH3-7-e007174-s001.pdf]
